# Supplementary material for: Comparative Effectiveness of Botulinum Toxin Injection for Chronic Shoulder Pain: A Meta-Analysis of Randomized Controlled Trials
Source: MDPI journal article supplement (doi:10.3390/toxins12040251), 2020-04-12
Supplement: s1 [file s1]

# Supplementary Materials: Comparative Effectiveness of Botulinum Toxin Injection for Chronic Shoulder Pain: A Meta-Analysis of Randomized Controlled Trials

Po-Cheng Hsu, Wei-Ting Wu, Der-Sheng Han and Ke-Vin Chang

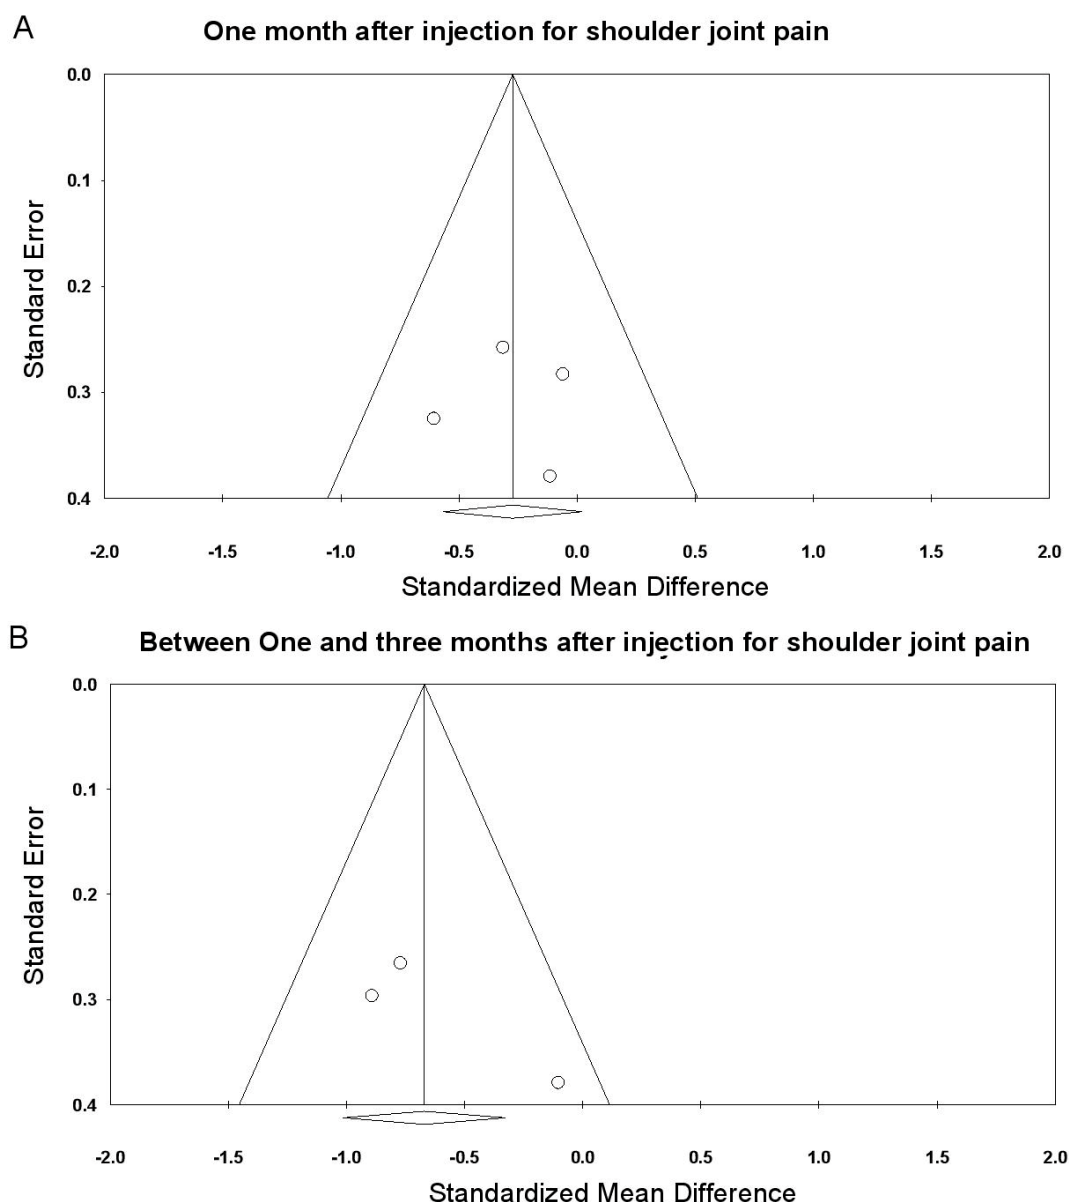

**Figure S1.** Funnel plot for the comparisons of the standardized mean difference at (A) one month and (B) between one and three months after injection for shoulder joint pain.

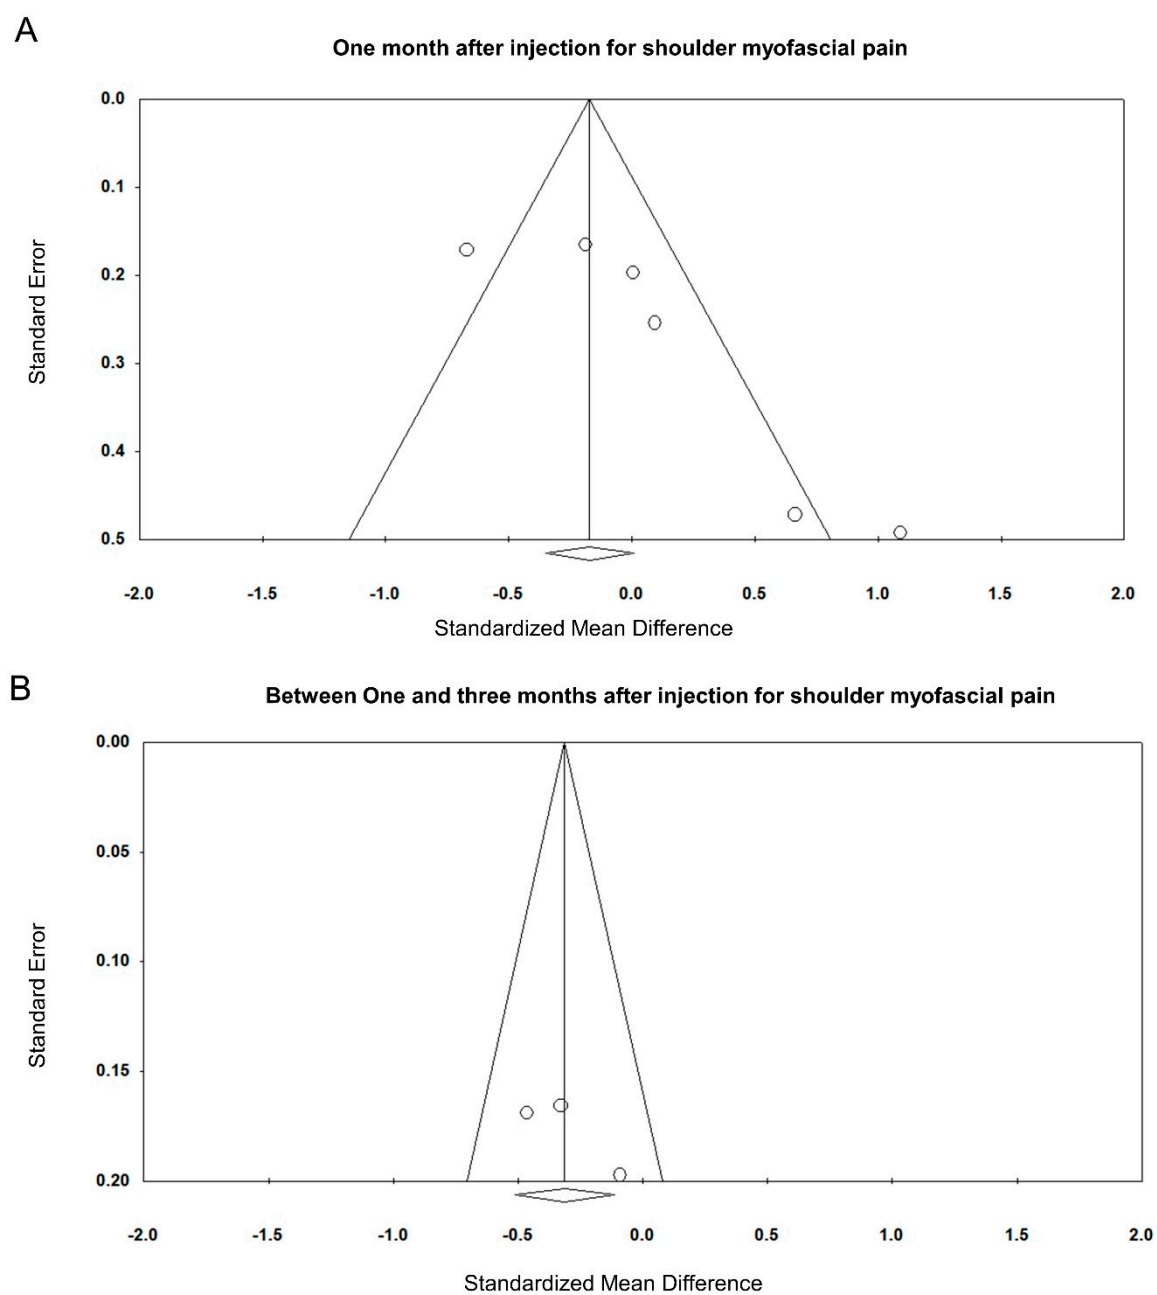

**Figure S2.** Funnel plot for the comparisons of the standardized mean difference at (A) one month and (B) between one and three months after injection for shoulder myofascial pain.
